# Supplementary material
Source: publisher site journal article supplement (https://www.spandidos-publications.com/6066/downloadSupplementary)
Supplement: Supplementary file 1 [file downloadSupplementary]

## **SEARCH STRATEGY:**

("lactat"[All Fields] OR "lactate s"[All Fields] OR "lactates"[MeSH Terms] OR "lactates"[All Fields] OR "lactic acid"[MeSH Terms] OR ("lactic"[All Fields] AND "acid"[All Fields]) OR "lactic acid"[All Fields] OR "lactate"[All Fields]) AND ("upper gastrointestinal tract"[MeSH Terms] OR ("upper"[All Fields] AND "gastrointestinal"[All Fields] AND "tract"[All Fields]) OR "upper gastrointestinal tract"[All Fields] OR ("upper"[All Fields] AND "gastrointestinal"[All Fields]) OR "upper gastrointestinal"[All Fields]) AND ("bleedings"[All Fields] OR "hemorrhage"[MeSH Terms] OR "hemorrhage"[All Fields] OR "bleed"[All Fields] OR "bleeding"[All Fields] OR "bleeds"[All Fields])
